# Supplementary material
Source: PubMed Central journal article supplement (PMC8106733)

**Supplemental Figure 1.** Graphical display of individual signal to cut-off values per enzyme immunoassays and time point for each site. Controls, samples from the specificity panel; T1 to T4, samples from the sensitivity panel, T1, 0-7 days post onset of symptoms (dpo); T2, 8-14 dpo; T3, 15-34 dpo; T4,  $\geq 35$  dpo. Black bar, median values; dotted lines represents the cut-off values of each tests.

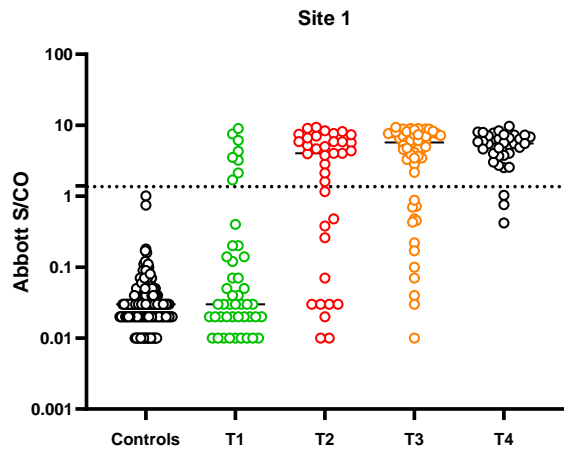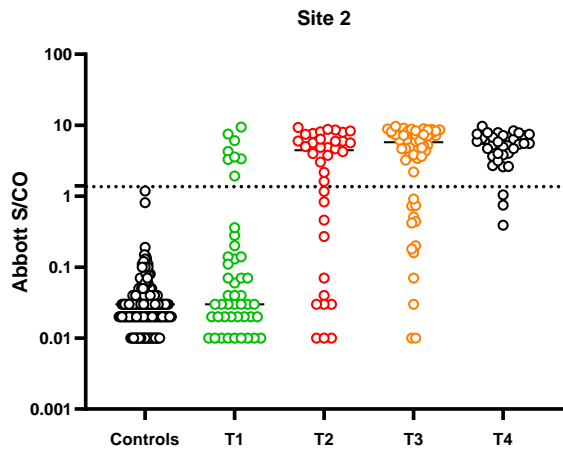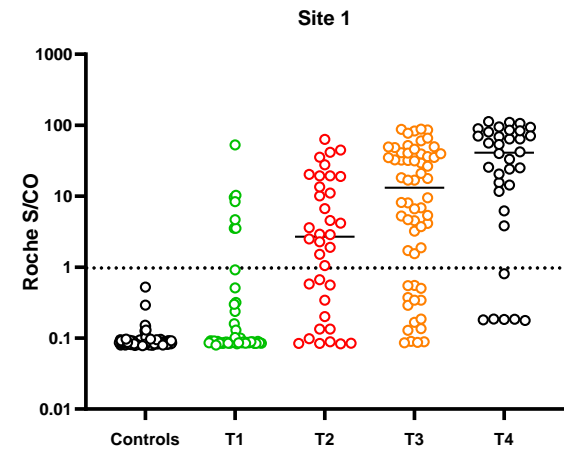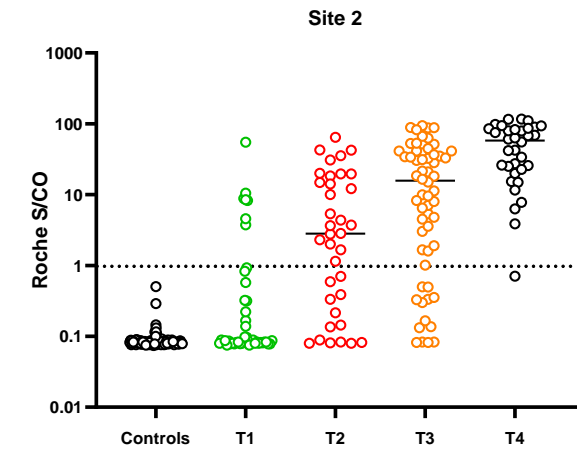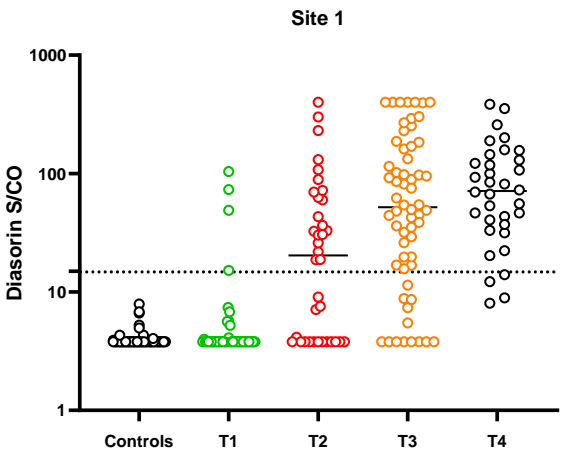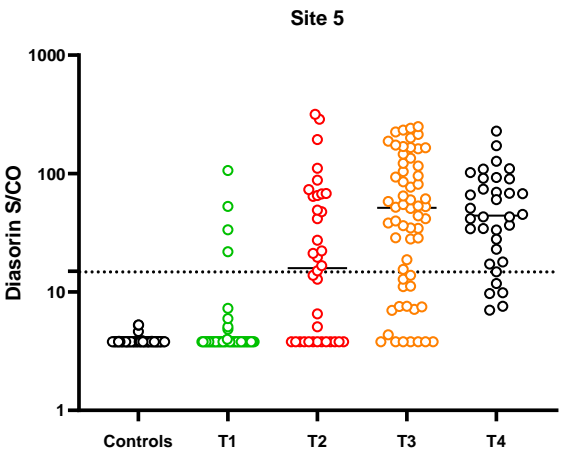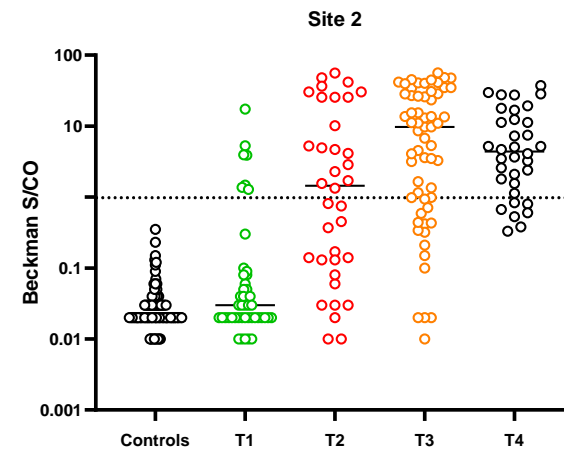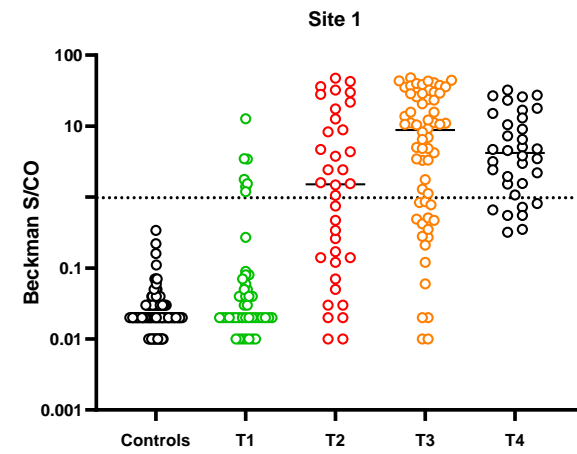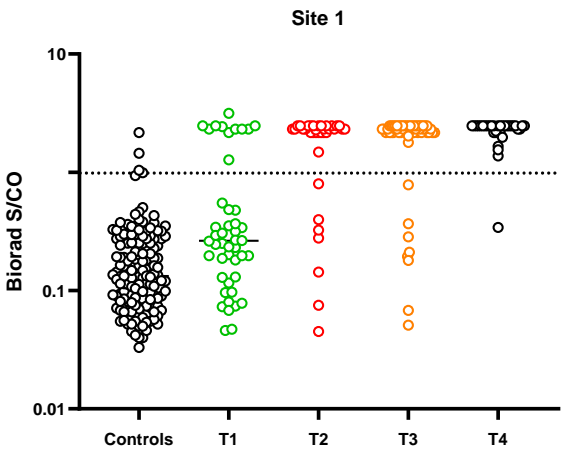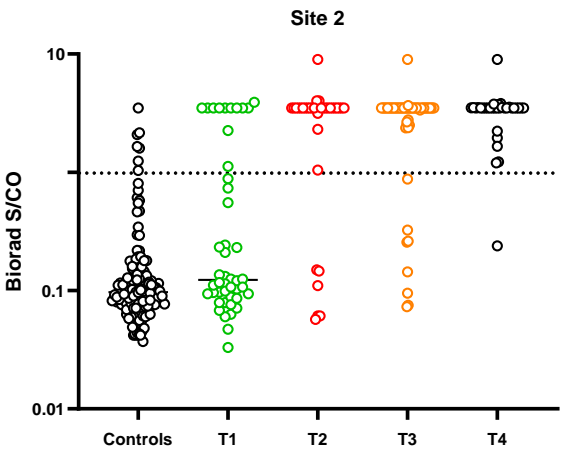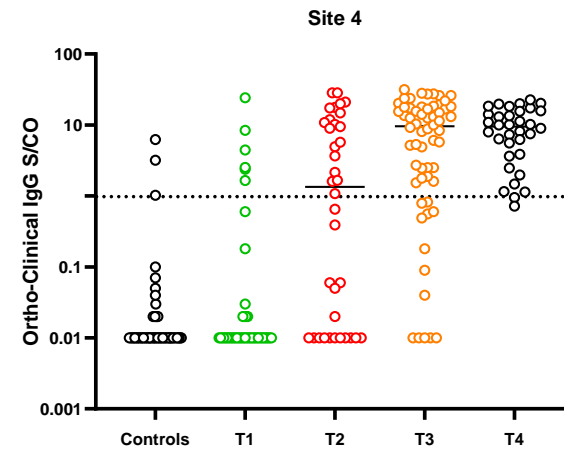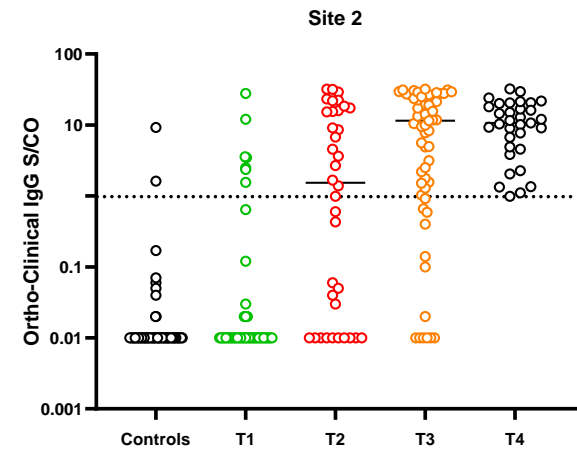

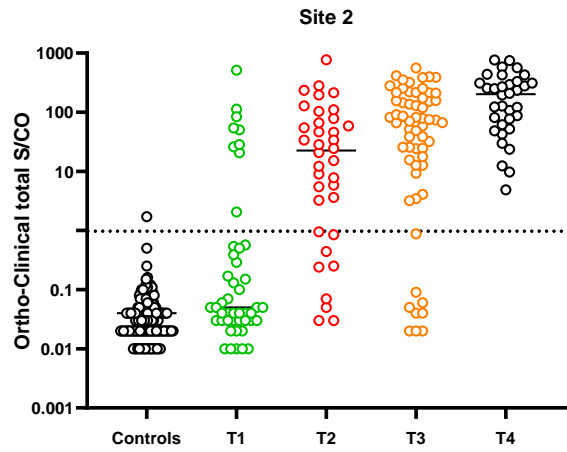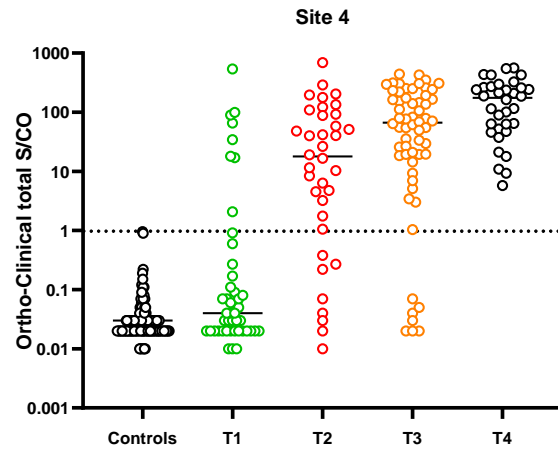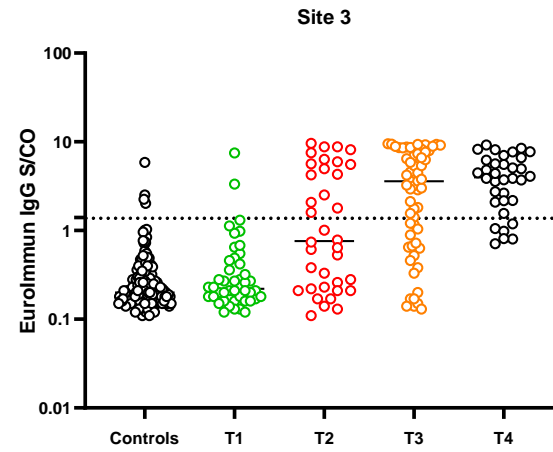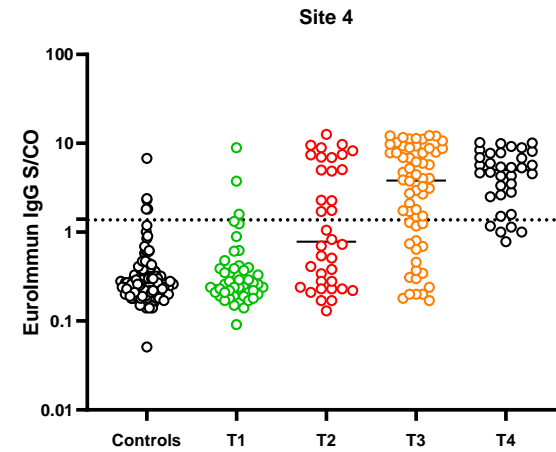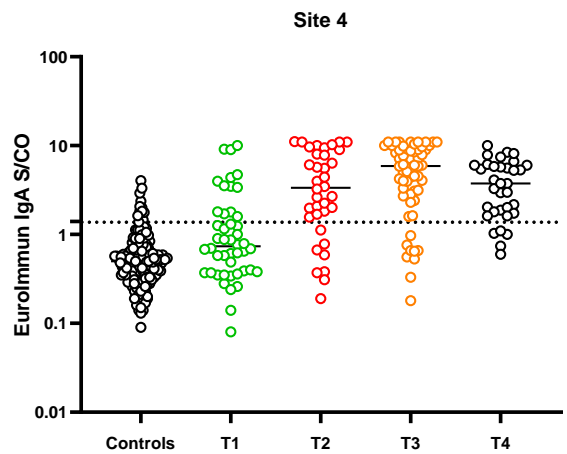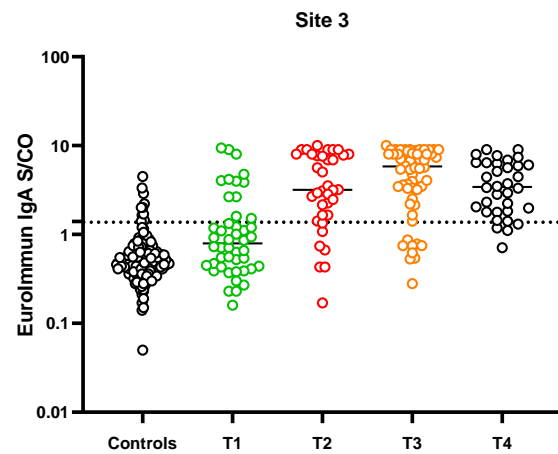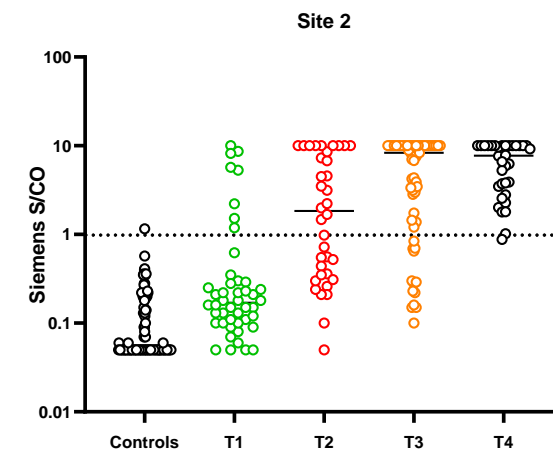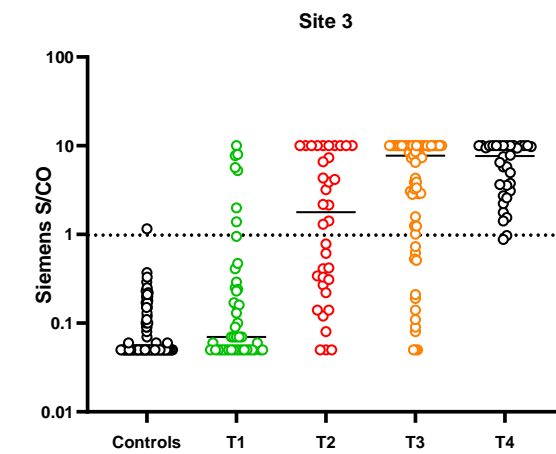

Supplement: JCM.02511-20-s0001.pdf [file JCM.02511-20-s0001.pdf]
